# Supplementary material for: Multiclass Comparative Analysis of Veterinary Drugs, Mycotoxins, and Pesticides in Bovine Milk by Ultrahigh-Performance Liquid Chromatography–Hybrid Quadrupole–Linear Ion Trap Mass Spectrometry
Source: MDPI journal article supplement (doi:10.3390/foods11030331), 2022-01-25
Supplement: s1 [file s1]

Table S1. MRM parameters, recoveries, RSDs, LODs, LOQs, and MRLs of China or EU for 209 contaminants

| No. | compound          | RT<br>(min) | precursor<br>(m/z) | product<br>1<br>(m/z) | product<br>2<br>(m/z) | DP<br>(V) | CE<br>1<br>(V) | CE<br>2<br>(V) | spiked<br>concentration<br>(μg/kg) | recovery<br>(μg/kg)    | RSD<br>(%)          | LOD<br>(μg/kg) | LOQ<br>(μg/kg) | MRL<br>(μg/kg)       |
|-----|-------------------|-------------|--------------------|-----------------------|-----------------------|-----------|----------------|----------------|------------------------------------|------------------------|---------------------|----------------|----------------|----------------------|
| 1   | difenoconazole    | 18.42       | 406.1              | 251                   | 337                   | 75        | 35             | 20             | 1,5,10                             | 97.63, 96.32, 87.66    | 5.22, 1.53, 2.54    | 0.5            | 1              | 5 (EU)               |
| 2   | imidacloprid      | 10.20       | 256.1              | 209                   | 175                   | 75        | 20             | 20             | 1,5,10                             | 110.78, 105.20, 90.31  | 3.02, 4.17, 9.71    | 0.5            | 1              | 100 (EU)             |
| 3   | profenofos        | 18.87       | 373                | 302.9                 | 345.2                 | 75        | 25             | 20             | 0.1,1,10                           | 98.27, 88.10, 82.51    | 10.37, 3.13, 4.13   | 0.05           | 0.1            | 10 (EU)              |
| 4   | diflubenzuron     | 17.68       | 311                | 158                   | 141.2                 | 70        | 20             | 45             | 1,5,10                             | 120.80, 117.20, 110.14 | 6.20, 8.27, 5.51    | 0.5            | 1              | 50 (EU)              |
| 5   | pyridaben         | 19.85       | 365                | 309                   | 147                   | 55        | 20             | 30             | 0.1,1,10                           | 96.30, 78.64, 70.53    | 17.38, 4.58, 3.98   | 0.05           | 0.1            | 20 (EU)              |
| 6   | dichlorvos        | 14.89       | 220.9              | 109                   | 145                   | 60        | 22             | 18             | 1,5,10                             | 102.02, 101.98, 91.90  | 3.18, 5.15, 2.76    | 0.5            | 1              |                      |
| 7   | acetamiprid       | 11.73       | 223                | 126                   | 99                    | 70        | 25             | 50             | 0.1,1,10                           | 118.37, 104.47, 88.44  | 3.58, 2.29, 4.26    | 0.05           | 0.1            | 200 (EU)             |
| 8   | chlorpyrifos      | 19.27       | 350                | 198                   | 97                    | 75        | 20             | 46             | 0.1,1,10                           | 116.65, 93.61, 81.35   | 4.45, 3.97, 5.17    | 0.05           | 0.1            | 10 (EU)              |
| 9   | parathion         | 17.86       | 292                | 236                   | 264                   | 90        | 19             | 13             | 0.1,1,10                           | 110.00, 94.71, 95.70   | 19.81, 11.34, 5.97  | 0.05           | 0.1            | 50 (EU)              |
| 10  | carbendazim       | 8.00        | 192                | 160                   | 132                   | 65        | 25             | 40             | 0.1,1,10                           | 102.27, 91.59, 82.34   | 1.20, 4.09, 4.33    | 0.05           | 0.1            | 50 (EU) <sup>a</sup> |
| 11  | pendimethalin     | 19.36       | 282.1              | 212                   | 194                   | 22        | 15             | 24             | 0.1,1,10                           | 102.52, 89.43, 82.52   | 12.36, 2.80, 3.83   | 0.05           | 0.1            | 10 (EU)              |
| 12  | diazinon          | 18.21       | 305                | 169                   | 153                   | 65        | 30             | 30             | 0.1,1,10                           | 109.27, 96.47, 88.96   | 7.3, 6.51, 4.99     | 0.05           | 0.1            | 20 (China)           |
| 13  | phosalone         | 18.28       | 368                | 182                   | 322                   | 38        | 20             | 12             | 0.1,1,10                           | 105.73, 91.67, 78.60   | 2.92, 3.55, 5.04    | 0.05           | 0.1            | 10 (EU)              |
| 14  | tau-fluvalinate   | 19.70       | 503                | 181                   | 208                   | 55        | 30             | 20             | 0.1,1,10                           | 109.54, 78.31, 66.09   | 13.32, 13.46, 10.57 | 0.05           | 0.1            | 50 (EU)              |
| 15  | chlorfluazuron    | 19.40       | 540                | 383                   | 158                   | 75        | 25             | 25             | 0.1,1,10                           | 95.47, 87.57, 75.77    | 12.39, 3.04, 3.40   | 0.05           | 0.1            |                      |
| 16  | emamectin B1a     | 18.67       | 886.4              | 158                   | 302                   | 40        | 40             | 40             | 0.1,1,10                           | 102.55, 97.49, 90.99   | 11.82, 2.41, 1.59   | 0.05           | 0.1            | 10 (EU)              |
| 17  | methamidophos     | 4.30        | 142                | 94                    | 124.9                 | 50        | 13             | 15             | 0.1,1,10                           | 78.95, 76.76, 73.10    | 8.03, 5.36, 4.12    | 0.05           | 0.1            | 10 (EU)              |
| 18  | phorate           | 18.40       | 261.1              | 75                    | 199                   | 25        | 11             | 10             | 1,5,10                             | 105.10, 111.97, 97.95  | 10.65, 13.01, 12.03 | 0.5            | 1              |                      |
| 19  | phorate sulfone   | 16.01       | 293                | 171                   | 143                   | 50        | 15             | 25             | 1,5,10                             | 117.86, 110.23, 99.67  | 14.23, 11.99, 11.76 | 0.5            | 1              |                      |
| 20  | phorate sulfoxide | 15.89       | 277                | 143                   | 199                   | 70        | 30             | 20             | 1,5,10                             | 106.24, 103.40, 94.18  | 9.61, 8.92, 5.82    | 0.5            | 1              |                      |
| 21  | isofenphos-methyl | 17.93       | 273                | 231                   | 121.1                 | 75        | 20             | 35             | 1,5,10                             | 114.70, 107.14, 97.27  | 8.94, 10.64, 10.55  | 0.5            | 1              |                      |

| No. | compound            | RT<br>(min) | precursor<br>(m/z) | product<br>1<br>(m/z) | product<br>2<br>(m/z) | DP<br>(V) | CE<br>1<br>(V) | CE<br>2<br>(V) | spiked<br>concentration<br>(μg/kg) | recovery<br>(μg/kg)    | RSD<br>(%)          | LOD<br>(μg/kg) | LOQ<br>(μg/kg) | MRL<br>(μg/kg)        |
|-----|---------------------|-------------|--------------------|-----------------------|-----------------------|-----------|----------------|----------------|------------------------------------|------------------------|---------------------|----------------|----------------|-----------------------|
| 22  | carbaryl            | 15.43       | 202.1              | 145                   | 127                   | 70        | 25             | 40             | 1,5,10                             | 108.80, 110.96, 105.34 | 11.19, 6.79, 4.87   | 0.5            | 1              | 50 (EU)               |
| 23  | fenpropathrin       | 19.27       | 350.2              | 125.1                 | 97.1                  | 55        | 20             | 40             | 0.1,1,10                           | 117.56, 86.12, 75.18   | 15.22, 3.58, 2.68   | 0.05           | 0.1            |                       |
| 24  | carbofuran          | 15.12       | 222.1              | 165                   | 123.1                 | 65        | 20             | 30             | 0.1,1,10                           | 118.48, 111.23, 97.94  | 5.30, 1.69, 6.68    | 0.05           | 0.1            | < LOD (China)         |
| 25  | 3-hydroxycarbofuran | 11.69       | 238                | 181                   | 163                   | 75        | 20             | 20             | 0.1,1,10                           | 111.93, 99.13, 87.16   | 4.58, 1.93, 5.04    | 0.05           | 0.1            |                       |
| 26  | dimethoate          | 11.70       | 230                | 125                   | 199                   | 60        | 25             | 20             | 0.1,1,10                           | 113.18, 102.93, 90.89  | 4.41, 3.40, 3.51    | 0.05           | 0.1            |                       |
| 27  | bifenthrin          | 20.29       | 440.2              | 181                   | 166                   | 40        | 18             | 53             | 1,5,10                             | 71.50, 64.13, 66.57    | 9.73, 10.46, 8.64   | 0.05           | 0.1            | 200 (EU)              |
| 28  | malathion           | 17.13       | 331                | 127                   | 285                   | 40        | 17             | 10             | 1,5,10                             | 123.27, 115.72, 105.22 | 15.55, 6.63, 11.53  | 0.5            | 1              | 20 (EU)               |
| 29  | prochloraz          | 18.23       | 376.2              | 308                   | 70.1                  | 65        | 20             | 30             | 1,5,10                             | 108.85, 101.88, 96.12  | 9.26, 6.78, 8.57    | 0.5            | 1              | 20 (EU)               |
| 30  | azoxystrobin        | 16.65       | 404.1              | 372                   | 344.1                 | 60        | 25             | 35             | 1,5,10                             | 128.01, 120.91, 92.91  | 6.97, 3.75, 2.74    | 0.5            | 1              |                       |
| 31  | pyrimethanil        | 16.77       | 200                | 107                   | 82                    | 70        | 35             | 35             | 1,5,10                             | 93.14, 102.18, 86.86   | 10.92, 5.04, 9.05   | 0.5            | 1              | 50 (EU)               |
| 32  | methomyl            | 7.22        | 163                | 106                   | 88                    | 65        | 20             | 25             | 0.1,1,10                           | 112.48, 104.48, 94.13  | 18.00, 8.96, 4.46   | 0.05           | 0.1            |                       |
| 33  | chlorbenzuron       | 17.93       | 309                | 156                   | 139                   | 65        | 25             | 35             | 1,5,10                             | 88.35, 85.68, 74.86    | 3.79, 3.40, 3.83    | 0.5            | 1              |                       |
| 34  | thiamethoxam        | 7.90        | 292                | 211                   | 181                   | 60        | 20             | 30             | 0.1,1,10                           | 117.69, 104.10, 86.34  | 3.33, 6.74, 4.57    | 0.05           | 0.1            |                       |
| 35  | triazophos          | 17.29       | 314                | 162                   | 119.1                 | 60        | 30             | 45             | 1,5,10                             | 111.76, 116.42, 99.74  | 7.7, 6.88, 4.03     | 0.5            | 1              | 10 (EU)               |
| 36  | triadimefon         | 17.24       | 294                | 197                   | 225                   | 70        | 25             | 20             | 1,5,10                             | 97.37, 106.06, 90.17   | 4.85, 4.26, 8.70    | 0.5            | 1              | 100 (EU) <sup>b</sup> |
| 37  | fenitrothion        | 17.28       | 278                | 125.1                 | 245.9                 | 95        | 25             | 22             | 1,5,10                             | 112.68, 106.39, 96.86  | 12.86, 13.07, 7.67  | 0.5            | 1              |                       |
| 38  | isocarbofos         | 16.25       | 273                | 231                   | 121                   | 40        | 10             | 33             | 1,5,10                             | 106.23, 98.26, 94.74   | 12.07, 3.00, 3.81   | 0.5            | 1              |                       |
| 39  | aldicarb            | 13.90       | 116.1              | 89.1                  | 70                    | 38        | 13             | 12             | 1,5,10                             | 105.22, 101.62, 98.15  | 7.82, 7.74, 7.08    | 0.5            | 1              | 10 (EU) <sup>c</sup>  |
| 40  | aldicarb sulfone    | 6.40        | 223                | 148                   | 76.1                  | 60        | 20             | 25             | 1,5,10                             | 105.78, 105.91, 92.98  | 4.83, 6.40, 2.23    | 0.5            | 1              |                       |
| 41  | aldicarb sulfoxide  | 5.80        | 207                | 132                   | 89                    | 75        | 20             | 25             | 1,5,10                             | 113.8, 100.81, 84.07   | 12.25, 13.31, 12.90 | 0.5            | 1              |                       |
| 42  | dimethomorph        | 17.12       | 388.1              | 301                   | 165                   | 70        | 30             | 40             | 0.1,1,10                           | 116.47, 99.79, 92.17   | 13.61, 6.54, 3.02   | 0.05           | 0.1            | 10 (EU)               |
| 43  | phoxim              | 18.17       | 299.1              | 77                    | 129                   | 55        | 35             | 25             | 1,5,10                             | 107.08, 100.99, 92.69  | 3.86, 5.20, 3.04    | 0.5            | 1              | 10 (China)            |
| 44  | phosmet             | 16.60       | 318                | 160                   | 133                   | 70        | 25             | 45             | 1,5,10                             | 90.87, 93.78, 91.37    | 5.14, 18.72, 9.26   | 0.5            | 1              | 50 (EU)               |

| No. | compound                 | RT<br>(min) | precursor<br>(m/z) | product<br>1<br>(m/z) | product<br>2<br>(m/z) | DP<br>(V) | CE<br>1<br>(V) | CE<br>2<br>(V) | spiked<br>concentration<br>(µg/kg) | recovery<br>(µg/kg)    | RSD<br>(%)          | LOD<br>(µg/kg) | LOQ<br>(µg/kg) | MRL<br>(µg/kg) |
|-----|--------------------------|-------------|--------------------|-----------------------|-----------------------|-----------|----------------|----------------|------------------------------------|------------------------|---------------------|----------------|----------------|----------------|
| 45  | omethoate                | 5.40        | 214                | 182.9                 | 109                   | 70        | 20             | 35             | 1,5,10                             | 120.71, 121.74, 76.38  | 4.46, 3.77, 9.20    | 0.5            | 1              |                |
| 46  | acephate                 | 4.90        | 184.1              | 143                   | 125                   | 70        | 11             | 23             | 0.1,1,10                           | 83.81, 82.10, 76.38    | 7.02, 7.26, 2.92    | 0.05           | 0.1            |                |
| 47  | iprodione                | 17.74       | 330.1              | 245                   | 288                   | 40        | 20             | 16             | 0.1,1,10                           | 111.46, 98.37, 89.56   | 14.78, 7.73, 4.86   | 0.05           | 0.1            |                |
| 48  | isocarbofos              | 17.98       | 194                | 95                    | 77                    | 85        | 15             | 50             | 1,5,10                             | 116.08, 110.59, 92.54  | 11.51, 11.00, 12.59 | 0.5            | 1              |                |
| 49  | buprofezin               | 19.01       | 305.7              | 106.3                 | 60                    | 80        | 45             | 55             | 0.1,1,10                           | 111.61, 83.15, 70.90   | 13.49, 3.35, 2.03   | 0.05           | 0.1            |                |
| 50  | tebuconazol              | 18.22       | 307.7              | 70                    | 125                   | 80        | 45             | 50             | 1,5,10                             | 88.94, 85.34, 81.12    | 5.87, 5.73, 6.18    | 0.5            | 1              |                |
| 51  | chlorantraniliprole      | 16.50       | 484                | 453                   | 286                   | 75        | 35             | 40             | 1,5,10                             | 107.86, 99.73, 97.78   | 14.05, 13.07, 6.17  | 0.5            | 1              | 50 (EU)        |
| 52  | fipronil                 | 17.60       | 434.836            | 329.9                 | 249.8                 | -55       | -25            | -35            | 0.1,1,10                           | 126.86, 103.45, 93.89  | 2.39, 5.05, 4.37    | 0.05           | 0.1            | 8 (EU)         |
| 53  | fipronil-sulfone         | 17.83       | 451                | 415.1                 | 281.9                 | -60       | -25            | -35            | 1,5,10                             | 115.15, 111.36, 101.33 | 2.98, 3.15, 2.20    | 0.5            | 1              |                |
| 54  | fipronil-sulfide         | 17.69       | 419                | 383                   | 261.7                 | -50       | -20            | -40            | 1,5,10                             | 110.13, 107.45, 97.75  | 4.36, 2.36, 1.85    | 0.5            | 1              |                |
| 55  | fipronil-desulfiny       | 17.43       | 387.1              | 351.1                 | 281.9                 | -45       | -20            | -40            | 1,5,10                             | 108.5, 99.38, 88.54    | 5.34, 5.95, 4.67    | 0.5            | 1              |                |
| 56  | deoxynivalenol           | 6.80        | 297.1              | 203.1                 | 249.1                 | 50        | 20             | 15             | 1,5,10                             | 82.54, 70.47, 71.02    | 13.44, 13.16, 15.14 | 0.5            | 1              |                |
| 57  | aflatoxin B1             | 15.00       | 313.28             | 285                   | 241.1                 | 95        | 30             | 50             | 0.1,1,10                           | 107.06, 106.13, 86.64  | 17.16, 19.83, 15.28 | 0.05           | 0.1            |                |
| 58  | aflatoxin B2             | 14.60       | 315.2              | 287.1                 | 259.1                 | 95        | 35             | 40             | 0.1,1,10                           | 115.47, 109.9, 89.94   | 5.93, 6.53, 4.28    | 0.05           | 0.1            |                |
| 59  | sterigmatocystin         | 17.56       | 325                | 310                   | 281                   | 85        | 35             | 45             | 0.5,5,10                           | 96.12, 90.00, 80.22    | 17.02, 13.89, 9.68  | 0.1            | 0.5            |                |
| 60  | aflatoxin G1             | 14.18       | 329                | 311.1                 | 243                   | 95        | 30             | 35             | 0.1,1,10                           | 117.35, 110.23, 88.23  | 6.21, 3.70, 7.46    | 0.05           | 0.1            |                |
| 61  | aflatoxin G2             | 13.64       | 331.29             | 245.1                 | 313.1                 | 95        | 40             | 35             | 0.1,1,10                           | 113.29, 105.01, 88.29  | 11.83, 3.68, 4.43   | 0.05           | 0.1            |                |
| 62  | 3-acetyl-deoxynivalenol  | 12.69       | 339.2              | 203                   | 213.3                 | 55        | 25             | 25             | 1,5,10                             | 114.27, 91.11, 82.75   | 13.08, 7.63, 7.85   | 0.5            | 1              |                |
| 63  | 15-acetyl-deoxynivalenol | 12.71       | 339.3              | 261                   | 137.1                 | 75        | 15             | 20             | 1,5,10                             | 109.79, 90.22, 80.22   | 14.8, 6.74, 16.79   | 0.5            | 1              |                |
| 64  | ochratoxin B             | 16.23       | 370.2              | 204.9                 | 102.8                 | 70        | 30             | 55             | 0.5,5,10                           | 115.64, 104.77, 99.21  | 17.35, 9.60, 4.74   | 0.1            | 0.5            |                |
| 65  | ochratoxin A             | 17.10       | 404                | 239                   | 358                   | 60        | 30             | 20             | 0.5,5,10                           | 105.92, 93.61, 85.73   | 16.91, 7.30, 10.43  | 0.1            | 0.5            |                |
| 66  | HT-2                     | 16.10       | 447.3              | 345.2                 | 285.1                 | 65        | 25             | 25             | 1,5,10                             | 110.35, 86.40, 68.89   | 11.37, 14.53, 11.44 | 0.5            | 1              |                |
| 67  | T-2                      | 16.65       | 489.31             | 387.2                 | 245.1                 | 65        | 30             | 35             | 0.5,5,10                           | 112.11, 79.25, 71.32   | 13.31, 6.09, 11.84  | 0.1            | 0.5            |                |

| No. | compound                    | RT<br>(min) | precursor<br>(m/z) | product<br>1<br>(m/z) | product<br>2<br>(m/z) | DP<br>(V) | CE<br>1<br>(V) | CE<br>2<br>(V) | spiked<br>concentration<br>(µg/kg) | recovery<br>(µg/kg)    | RSD<br>(%)          | LOD<br>(µg/kg) | LOQ<br>(µg/kg) | MRL<br>(µg/kg) |
|-----|-----------------------------|-------------|--------------------|-----------------------|-----------------------|-----------|----------------|----------------|------------------------------------|------------------------|---------------------|----------------|----------------|----------------|
| 68  | verruculogen                | 17.91       | 534.32             | 392.2                 | 435.2                 | 65        | 20             | 20             | 0.5,5,10                           | 125.62, 87.22, 83.30   | 14.90, 8.82, 13.26  | 0.1            | 0.5            |                |
| 69  | aflatoxin M1                | 13.80       | 329.1              | 273                   | 259.1                 | 100       | 34             | 35             | 0.05,1,10                          | 108.83, 104.27, 84.29  | 9.35, 4.86, 2.55    | 0.01           | 0.05           | 0.05 (EU)      |
| 70  | aflatoxin M2                | 13.16       | 331.1              | 273                   | 259.1                 | 80        | 33             | 34             | 0.1,1,10                           | 122.51, 107.69, 84.32  | 6.29, 7.68, 4.01    | 0.05           | 0.1            |                |
| 71  | zearalenone                 | 17.22       | 317                | 175                   | 131                   | -100      | -31            | -34            | 0.5,1,10                           | 103.11, 87.06, 91.04   | 11.96, 5.75, 4.30   | 0.1            | 0.5            |                |
| 72  | medroxyprogesterone acetate | 18.13       | 387.1              | 327.3                 | 123                   | 96        | 18             | 30             | 0.5,5,25                           | 126.44, 95.24, 81.90   | 15.84, 3.68, 5.63   | 0.1            | 0.5            |                |
| 73  | methyltestosterone          | 17.69       | 303.2              | 109                   | 97                    | 106       | 30             | 28             | 0.5,5,25                           | 117.45, 90.16, 79.82   | 19.10, 4.34, 7.37   | 0.1            | 0.5            |                |
| 74  | testosterone propionate     | 19.33       | 345.2              | 97                    | 109                   | 114       | 23             | 29             | 0.5,5,25                           | 93.50, 80.74, 74.19    | 8.29, 1.81, 1.49    | 0.1            | 0.5            | < LOD (China)  |
| 75  | chlormadinone acetate       | 18.05       | 405.2              | 309.2                 | 345.2                 | 100       | 21             | 17             | 0.5,5,25                           | 111.18, 98.79, 86.63   | 17.91, 6.69, 6.02   | 0.1            | 0.5            | 2.5 (EU)       |
| 76  | boldenone                   | 16.83       | 287.1              | 121                   | 135                   | 85        | 25             | 19             | 0.5,5,25                           | 123.70, 91.27, 87.61   | 3.03, 5.30, 8.35    | 0.1            | 0.5            |                |
| 77  | trenbolone                  | 16.70       | 271                | 253.1                 | 199                   | 90        | 27             | 33             | 0.5,5,25                           | 124.29, 116.45, 100.34 | 19.62, 8.10, 2.99   | 0.1            | 0.5            | < LOD (China)  |
| 78  | nadrolone phenylpropionate  | 19.86       | 407.2              | 105.2                 | 257.2                 | 80        | 36             | 25             | 0.5,5,25                           | 87.39, 67.29, 62.25    | 10.60, 4.57, 5.22   | 0.1            | 0.5            |                |
| 79  | glibenclamide               | 17.49       | 494.2              | 369                   | 169                   | 90        | 18             | 45             | 0.5,5,25                           | 125.13, 107.20, 91.76  | 13.31, 16.17, 13.91 | 0.1            | 0.5            |                |
| 80  | glimepiride                 | 17.84       | 491.2              | 352                   | 126.2                 | 90        | 19             | 34             | 0.5,5,25                           | 124.66, 113.43, 93.92  | 8.50, 10.38, 6.93   | 0.1            | 0.5            |                |
| 81  | glipizide                   | 16.28       | 446.2              | 321.2                 | 103                   | 85        | 20             | 62             | 0.5,5,25                           | 108.89, 92.89, 88.41   | 13.79, 16.4, 9.67   | 0.1            | 0.5            |                |
| 82  | repaglinde                  | 18.71       | 453.3              | 230.2                 | 162                   | 100       | 38             | 27             | 0.5,5,25                           | 105.60, 99.52, 86.54   | 8.67, 3.05, 3.34    | 0.1            | 0.5            |                |
| 83  | tolbutamide                 | 15.94       | 271.1              | 155                   | 91.1                  | 72        | 24             | 45             | 0.5,5,25                           | 99.04, 99.68, 91.06    | 9.39, 5.87, 5.87    | 0.1            | 0.5            |                |
| 84  | hydrocortisone acetate      | 18.05       | 405.3              | 309.2                 | 327.2                 | 80        | 25             | 24             | 0.5,5,25                           | 114.38, 101.27, 88.90  | 6.16, 14.51, 3.59   | 0.1            | 0.5            |                |
| 85  | tenoxicam                   | 13.36       | 338.2              | 121.1                 | 78                    | 80        | 26             | 80             | 0.5,5,25                           | 108.23, 104.13, 92.73  | 6.11, 2.51, 3.94    | 0.1            | 0.5            |                |
| 86  | flufenamic acid             | 18.52       | 282.2              | 264                   | 167                   | 40        | 24             | 55             | 1,5,25                             | 129.85, 102.54, 95.03  | 10.2, 3.99, 6.27    | 0.5            | 1              |                |
| 87  | indoprofen                  | 16.12       | 282.2              | 236                   | 218                   | 85        | 28             | 43             | 0.5,5,25                           | 115.04, 105.44, 85.75  | 10.45, 7.56, 8.80   | 0.1            | 0.5            |                |
| 88  | sasapyrine                  | 16.51       | 259.2              | 120                   | 119                   | 50        | 22             | 22             | 0.5,5,25                           | 97.91, 103.85, 100.29  | 11.74, 7.41, 13.46  | 0.1            | 0.5            |                |
| 89  | tolfenamic acid             | 18.99       | 262.2              | 244.1                 | 209                   | 40        | 21             | 38             | 0.5,5,25                           | 120.15, 99.20, 92.41   | 13.73, 12.07, 3.76  | 0.1            | 0.5            | 50 (EU)        |
| 90  | meloxicam                   | 16.37       | 352.1              | 115                   | 141                   | 50        | 24             | 26             | 0.5,5,25                           | 121.60, 108.83, 102.17 | 16.54, 6.85, 12.72  | 0.1            | 0.5            |                |

| No. | compound                | RT<br>(min) | precursor<br>(m/z) | product<br>1<br>(m/z) | product<br>2<br>(m/z) | DP<br>(V) | CE<br>1<br>(V) | CE<br>2<br>(V) | spiked<br>concentration<br>(μg/kg) | recovery<br>(μg/kg)    | RSD<br>(%)         | LOD<br>(μg/kg) | LOQ<br>(μg/kg) | MRL<br>(μg/kg) |
|-----|-------------------------|-------------|--------------------|-----------------------|-----------------------|-----------|----------------|----------------|------------------------------------|------------------------|--------------------|----------------|----------------|----------------|
| 91  | flunixin                | 17.59       | 297.1              | 279.1                 | 264                   | 45        | 32             | 45             | 0.5,5,25                           | 109.94, 104.24, 85.47  | 12.73, 4.77, 6.76  | 0.1            | 0.5            | 0.1 (EU)       |
| 92  | mefenamic acid          | 18.73       | 242.1              | 224.1                 | 209                   | 40        | 21             | 39             | 1,5,25                             | 117.64, 100.47, 88.36  | 8.42, 6.81, 2.16   | 0.5            | 1              |                |
| 93  | diclofenac              | 17.92       | 296.2              | 215                   | 250.1                 | 32        | 26             | 19             | 0.1,5,25                           | 114.30, 121.50, 106.19 | 11.27, 4.60, 2.80  | 0.05           | 0.1            |                |
| 94  | piroxicam               | 15.63       | 332.2              | 95.1                  | 164                   | 50        | 23             | 24             | 0.5,5,25                           | 102.36, 94.94, 90.86   | 7.45, 5.24, 3.61   | 0.1            | 0.5            |                |
| 95  | nabumetone              | 17.26       | 229.1              | 171.1                 | 128.2                 | 40        | 23             | 53             | 1,5,25                             | 128.05, 124.96, 101.38 | 8.85, 8.29, 13.08  | 0.5            | 1              |                |
| 96  | sulindac                | 16.52       | 357.2              | 233                   | 340                   | 80        | 65             | 28             | 0.5,5,25                           | 119.48, 110.55, 106.20 | 14.6, 17.17, 7.23  | 0.1            | 0.5            |                |
| 97  | tolmetin                | 16.51       | 258.2              | 119.1                 | 91                    | 60        | 24             | 51             | 0.5,5,25                           | 101.84, 103.21, 88.04  | 6.27, 19.69, 7.48  | 0.1            | 0.5            |                |
| 98  | indomethacin            | 17.95       | 358.2              | 139                   | 111                   | 60        | 27             | 70             | 0.5,5,25                           | 126.25, 105.89, 98.75  | 13.63, 6.73, 2.83  | 0.1            | 0.5            | 100 (China)    |
| 99  | sulfadiazine            | 5.50        | 251.1              | 156                   | 92                    | 40        | 22             | 38             | 5,10,25                            | 121.63, 106.57, 87.04  | 4.56, 4.41, 7.00   | 1              | 5              |                |
| 100 | sulfathiazole           | 5.70        | 256                | 156                   | 108                   | 40        | 22             | 32             | 0.5,5,25                           | 125.92, 114.7, 88.71   | 11.28, 10.84, 4.08 | 0.1            | 0.5            |                |
| 101 | sulfapyridine           | 6.20        | 250.1              | 156.1                 | 108                   | 40        | 23             | 32             | 0.5,5,25                           | 125.81, 108.28, 85.86  | 3.83, 3.95, 4.13   | 0.1            | 0.5            |                |
| 102 | sulfamerazine           | 6.60        | 265.2              | 156.1                 | 172.1                 | 82        | 25             | 25             | 0.5,5,25                           | 119.18, 110.64, 90.84  | 4.03, 3.69, 5.27   | 0.1            | 0.5            |                |
| 103 | sulfamethazine          | 8.00        | 279.11             | 186.1                 | 156                   | 60        | 23             | 27             | 0.5,5,25                           | 118.21, 111.44, 91.45  | 3.80, 3.54, 4.68   | 0.1            | 0.5            |                |
| 104 | sulfamonomethoxine      | 8.25        | 281.1              | 156                   | 126.1                 | 75        | 25             | 30             | 0.5,5,25                           | 119.22, 112.84, 96.05  | 4.48, 6.31, 4.67   | 0.1            | 0.5            |                |
| 105 | sulfamethizole          | 7.53        | 271                | 156.1                 | 108                   | 65        | 21             | 36             | 0.5,5,25                           | 117.77, 106.40, 85.41  | 2.56, 7.20, 4.81   | 0.1            | 0.5            | 0.1 (EU)       |
| 106 | sulfameter              | 8.30        | 281.1              | 156.1                 | 108.1                 | 70        | 25             | 35             | 0.5,5,25                           | 109.08, 104.07, 87.36  | 2.51, 3.04, 6.76   | 0.1            | 0.5            |                |
| 107 | sulfachloropyridazine   | 9.00        | 285.1              | 156                   | 108.1                 | 65        | 22             | 37             | 0.5,5,25                           | 119.43, 113.44, 90.96  | 3.20, 2.41, 3.52   | 0.1            | 0.5            |                |
| 108 | sulfamethoxy pyridazine | 8.26        | 281                | 156                   | 126.1                 | 75        | 25             | 27             | 0.5,5,25                           | 119.29, 110.47, 92.11  | 2.97, 3.66, 3.84   | 0.1            | 0.5            |                |
| 109 | sulfadoxine             | 10.21       | 311.11             | 156.1                 | 108.2                 | 70        | 30             | 37             | 0.5,5,25                           | 114.57, 104.45, 91.21  | 3.28, 5.33, 5.54   | 0.1            | 0.5            |                |
| 110 | sulfadimethoxine        | 13.21       | 311.1              | 156.1                 | 218                   | 70        | 28             | 28             | 0.5,5,25                           | 107.58, 107.5, 87.96   | 3.29, 4.99, 5.25   | 0.1            | 0.5            |                |
| 111 | sulfamethoxazole        | 9.30        | 254.1              | 156                   | 108                   | 65        | 22             | 36             | 1,5,25                             | 128.65, 114.74, 96.49  | 2.88, 4.20, 4.74   | 0.5            | 1              |                |
| 112 | sulfisoxazole           | 10.20       | 268.1              | 156.1                 | 113.2                 | 82        | 22             | 25             | 0.5,5,25                           | 125.23, 116.11, 90.60  | 5.52, 2.44, 8.94   | 0.1            | 0.5            | 0.1 (EU)       |
| 113 | sulfabenzamide          | 11.30       | 277.1              | 156                   | 108                   | 60        | 19             | 32             | 0.5,5,25                           | 115.91, 105.39, 88.04  | 1.48, 2.10, 3.99   | 0.1            | 0.5            |                |

| No. | compound              | RT<br>(min) | precursor<br>(m/z) | product<br>1<br>(m/z) | product<br>2<br>(m/z) | DP<br>(V) | CE<br>1<br>(V) | CE<br>2<br>(V) | spiked<br>concentration<br>(µg/kg) | recovery<br>(µg/kg)    | RSD<br>(%)          | LOD<br>(µg/kg) | LOQ<br>(µg/kg) | MRL<br>(µg/kg) |
|-----|-----------------------|-------------|--------------------|-----------------------|-----------------------|-----------|----------------|----------------|------------------------------------|------------------------|---------------------|----------------|----------------|----------------|
| 114 | sulfaquinoxaline      | 13.63       | 301.1              | 156                   | 108                   | 80        | 24             | 36             | 0.5,5,25                           | 112.93, 108.35, 92.85  | 7.83, 3.86, 2.97    | 0.1            | 0.5            | 50 (China)     |
| 115 | sulphacetamide        | 3.40        | 215                | 156                   | 108                   | 52        | 17             | 29             | 0.5,5,25                           | 78.18, 93.55, 71.40    | 9.66, 5.03, 7.08    | 0.1            | 0.5            |                |
| 116 | trimethoprim          | 7.20        | 291.1              | 230.1                 | 123.1                 | 95        | 33             | 34             | 0.5,5,25                           | 99.00, 95.26, 85.08    | 1.22, 4.93, 6.07    | 0.1            | 0.5            |                |
| 117 | sulfaphenazole        | 12.54       | 315                | 156                   | 108                   | 90        | 27             | 40             | 0.5,5,25                           | 118.02, 107.62, 93.59  | 5.16, 6.25, 2.82    | 0.1            | 0.5            |                |
| 118 | midazolam             | 15.02       | 326.1              | 291.1                 | 249                   | 110       | 37             | 49             | 0.5,5,25                           | 104.85, 102.69, 92.19  | 5.13, 5.65, 5.04    | 0.1            | 0.5            |                |
| 119 | alprazolam            | 16.35       | 309.1              | 281.1                 | 205                   | 100       | 39             | 55             | 0.5,5,25                           | 101.75, 98.64, 83.07   | 11.12, 11.55, 6.86  | 0.1            | 0.5            | < LOD (China)  |
| 120 | clonazepam            | 15.73       | 316.1              | 270                   | 214                   | 90        | 35             | 52             | 0.5,5,25                           | 119.06, 107.77, 99.26  | 2.34, 4.15, 6.71    | 0.1            | 0.5            |                |
| 121 | diazepam              | 17.17       | 285.1              | 193                   | 154                   | 80        | 40             | 36             | 0.5,5,25                           | 104.43, 97.95, 92.13   | 6.73, 1.90, 5.86    | 0.1            | 0.5            |                |
| 122 | lorazepam             | 16.26       | 321.1              | 275.1                 | 229.1                 | 80        | 30             | 41             | 0.5,5,25                           | 124.66, 106.18, 92.27  | 13.73, 11.90, 10.53 | 0.1            | 0.5            |                |
| 123 | triazolam             | 16.22       | 343.1              | 308.1                 | 239                   | 100       | 36             | 55             | 0.5,5,25                           | 92.56, 91.40, 89.59    | 13.34, 8.04, 11.99  | 0.1            | 0.5            |                |
| 124 | oxazepam              | 16.32       | 287.1              | 241                   | 269                   | 90        | 32             | 21             | 0.5,5,25                           | 110.45, 105.14, 89.12  | 10.45, 5.51, 5.13   | 0.1            | 0.5            | < LOD (China)  |
| 125 | nitrazepam            | 16.12       | 282.2              | 236.1                 | 180                   | 80        | 34             | 50             | 0.5,5,25                           | 103.40, 97.12, 85.76   | 4.37, 10.73, 5.01   | 0.1            | 0.5            |                |
| 126 | hydroxy metronidazole | 4.70        | 188.2              | 123                   | 126                   | 50        | 19             | 23             | 0.5,5,25                           | 74.86, 62.71, 74.33    | 10.62, 7.02, 14.65  | 0.1            | 0.5            |                |
| 127 | metronidazole         | 5.92        | 172.2              | 127.9                 | 82                    | 50        | 20             | 37             | 0.5,5,25                           | 108.62, 90.73, 84.02   | 6.28, 2.66, 7.72    | 0.1            | 0.5            |                |
| 128 | dimetridazole         | 6.72        | 142.2              | 96                    | 81                    | 65        | 21             | 36             | 5,10,25                            | 89.19, 92.83, 81.64    | 5.52, 4.36, 5.52    | 1              | 5              |                |
| 129 | ronidazole            | 5.73        | 201.2              | 140                   | 55                    | 50        | 15             | 27             | 0.5,5,25                           | 119.48, 100.70, 84.63  | 4.47, 4.20, 9.67    | 0.1            | 0.5            | < LOD (China)  |
| 130 | 5-nitrobenzimidazole  | 9.64        | 164.2              | 118                   | 90.9                  | 80        | 27             | 46             | 0.5,5,25                           | 102.93, 86.95, 80.59   | 4.49, 2.49, 7.30    | 0.1            | 0.5            | 100 (China)    |
| 131 | ipronidazole          | 12.45       | 170.3              | 124                   | 109                   | 50        | 25             | 33             | 0.5,5,25                           | 113.41, 96.29, 88.76   | 11.53, 4.69, 3.23   | 0.1            | 0.5            |                |
| 132 | albendazole           | 16.77       | 266.3              | 234                   | 190.9                 | 90        | 28             | 44             | 0.5,5,25                           | 122.24, 114.84, 100.89 | 14.52, 6.9, 0.99    | 0.1            | 0.5            |                |
| 133 | albendazole sulfoxide | 13.51       | 282.1              | 240                   | 208                   | 70        | 19             | 34             | 0.5,5,25                           | 108.54, 98.91, 88.7    | 1.74, 1.71, 2.47    | 0.1            | 0.5            |                |
| 134 | flubendazole          | 16.34       | 314.1              | 282                   | 123                   | 90        | 32             | 48             | 0.5,5,25                           | 128.28, 117.8, 99.97   | 11.09, 10.9, 10.31  | 0.1            | 0.5            |                |
| 135 | fenbendazole          | 17.41       | 300.2              | 268                   | 158.9                 | 100       | 30             | 46             | 0.5,5,25                           | 127.75, 124.75, 100.32 | 6.32, 11.60, 5.37   | 0.1            | 0.5            | 10 (EU)        |
| 136 | oxfendazole           | 14.75       | 316.2              | 159                   | 191.1                 | 70        | 43             | 27             | 0.5,5,25                           | 121.16, 109.17, 95.02  | 3.42, 2.61, 2.18    | 0.1            | 0.5            |                |

| No. | compound       | RT<br>(min) | precursor<br>(m/z) | product<br>1<br>(m/z) | product<br>2<br>(m/z) | DP<br>(V) | CE<br>1<br>(V) | CE<br>2<br>(V) | spiked<br>concentration<br>(μg/kg) | recovery<br>(μg/kg)   | RSD<br>(%)         | LOD<br>(μg/kg) | LOQ<br>(μg/kg) | MRL<br>(μg/kg) |
|-----|----------------|-------------|--------------------|-----------------------|-----------------------|-----------|----------------|----------------|------------------------------------|-----------------------|--------------------|----------------|----------------|----------------|
| 137 | mebendazole    | 16.05       | 296.3              | 264.1                 | 77.1                  | 100       | 32             | 76             | 0.5,5,25                           | 124.58, 108.22, 96.97 | 13.44, 5.65, 9.41  | 0.1            | 0.5            |                |
| 138 | thiabendazole  | 9.78        | 202.2              | 175                   | 130.9                 | 60        | 37             | 48             | 0.5,5,25                           | 96.93, 84.28, 76.89   | 1.33, 3.54, 4.67   | 0.1            | 0.5            | 100 (China)    |
| 139 | tinidazole     | 6.93        | 248.2              | 121.2                 | 93                    | 80        | 21             | 25             | 0.5,5,25                           | 129.76, 109.21, 87.42 | 4.23, 4.28, 4.07   | 0.1            | 0.5            |                |
| 140 | ornidazole     | 9.88        | 220                | 128                   | 82                    | 70        | 23             | 43             | 0.5,5,25                           | 124.36, 106.88, 89.03 | 1.73, 9.21, 6.24   | 0.1            | 0.5            |                |
| 141 | ractopamine    | 9.00        | 302.2              | 164.1                 | 107.1                 | 80        | 23             | 51             | 0.5,5,25                           | 104.77, 97.42, 87.50  | 1.82, 3.40, 6.78   | 0.1            | 0.5            | < LOD (China)  |
| 142 | salbutamol     | 4.87        | 240.2              | 148.1                 | 222.1                 | 70        | 24             | 15             | 0.5,5,25                           | 57.17, 54.95, 54.01   | 4.44, 6.64, 1.98   | 0.1            | 0.5            | < LOD (China)  |
| 143 | terbutaline    | 4.77        | 226.2              | 152                   | 107.1                 | 70        | 21             | 36             | 0.5,5,25                           | 79.06, 68.83, 60.93   | 3.98, 6.35, 4.67   | 0.1            | 0.5            | < LOD (China)  |
| 144 | cimaterol      | 4.66        | 220                | 202                   | 160                   | 65        | 13             | 22             | 0.5,5,25                           | 96.80, 91.49, 82.85   | 13.59, 4.48, 4.46  | 0.1            | 0.5            | < LOD (China)  |
| 145 | clenbuterol    | 10.46       | 277                | 203                   | 168.1                 | 65        | 21             | 38             | 0.05,5,25                          | 112.31, 103.93, 91.28 | 4.49, 2.64, 5.44   | 0.01           | 0.05           | < LOD (China)  |
| 146 | tulobuterol    | 12.32       | 228                | 154                   | 118                   | 65        | 21             | 35             | 0.5,5,25                           | 112.07, 103.96, 88.14 | 5.57, 2.14, 4.34   | 0.1            | 0.5            | < LOD (China)  |
| 147 | penbutolol     | 16.45       | 292.2              | 236.2                 | 201                   | 73        | 23             | 28             | 0.5,5,25                           | 116.33, 106.74, 89.38 | 5.36, 10.19, 4.04  | 0.1            | 0.5            | < LOD (China)  |
| 148 | propanolol     | 14.47       | 260.1              | 116.1                 | 183.1                 | 80        | 23             | 24             | 0.5,5,25                           | 119.11, 112.94, 91.39 | 4.65, 4.03, 7.35   | 0.1            | 0.5            |                |
| 149 | clorprenaline  | 9.74        | 214                | 154.1                 | 118                   | 73        | 23             | 34             | 0.5,5,25                           | 110.32, 99.03, 84.36  | 11.5, 3.75, 4.11   | 0.1            | 0.5            |                |
| 150 | enrofloxacin   | 9.55        | 360                | 316.1                 | 245.1                 | 80        | 25             | 35             | 0.5,5,25                           | 98.58, 98.28, 90.82   | 3.24, 4.11, 4.91   | 0.1            | 0.5            | 100 (China)    |
| 151 | pefloxacin     | 8.16        | 334.1              | 316.1                 | 290.2                 | 80        | 27             | 25             | 0.5,5,25                           | 71.33, 93.36, 84.38   | 16.02, 3.58, 4.00  | 0.1            | 0.5            |                |
| 152 | ciprofloxacin  | 9.00        | 332.1              | 288.1                 | 245.1                 | 80        | 25             | 33             | 0.5,5,25                           | 75.42, 77.84, 76.33   | 14.54, 14.78, 6.35 | 0.1            | 0.5            |                |
| 153 | ofloxacin      | 8.05        | 362.2              | 318.1                 | 261.1                 | 80        | 26             | 38             | 0.5,5,25                           | 85.99, 87.33, 80.05   | 5.16, 1.99, 6.37   | 0.1            | 0.5            |                |
| 154 | sarafloxacin   | 11.10       | 386                | 342.3                 | 299                   | 80        | 25             | 38             | 0.5,5,25                           | 94.00, 99.80, 91.06   | 4.30, 2.77, 3.78   | 0.1            | 0.5            |                |
| 155 | enoxacin       | 8.20        | 321                | 303                   | 234                   | 80        | 24             | 30             | 0.5,5,25                           | 52.08, 79.26, 74.65   | 11.39, 3.92, 5.00  | 0.1            | 0.5            |                |
| 156 | lomefloxacin   | 10.00       | 352                | 265                   | 308.1                 | 80        | 33             | 28             | 0.5,5,25                           | 89.32, 91.45, 84.02   | 4.86, 3.16, 4.93   | 0.1            | 0.5            |                |
| 157 | nalidixic acid | 15.15       | 233                | 215                   | 187                   | 68        | 18             | 34             | 0.5,5,25                           | 99.82, 94.18, 86.97   | 11.35, 4.02, 2.30  | 0.1            | 0.5            |                |
| 158 | oxolinic acid  | 13.77       | 262                | 244.1                 | 216.1                 | 70        | 26             | 40             | 0.5,5,25                           | 109.76, 107.93, 95.84 | 3.20, 3.99, 7.22   | 0.1            | 0.5            |                |
| 159 | flumequin      | 15.40       | 262.1              | 244.1                 | 202.1                 | 77        | 23             | 42             | 0.5,5,25                           | 95.62, 105.00, 95.45  | 19.20, 6.17, 2.79  | 0.1            | 0.5            |                |

| No. | compound              | RT<br>(min) | precursor<br>(m/z) | product<br>1<br>(m/z) | product<br>2<br>(m/z) | DP<br>(V) | CE<br>1<br>(V) | CE<br>2<br>(V) | spiked<br>concentration<br>(μg/kg) | recovery<br>(μg/kg)   | RSD<br>(%)          | LOD<br>(μg/kg) | LOQ<br>(μg/kg) | MRL<br>(μg/kg) |
|-----|-----------------------|-------------|--------------------|-----------------------|-----------------------|-----------|----------------|----------------|------------------------------------|-----------------------|---------------------|----------------|----------------|----------------|
| 160 | danofloxacin          | 9.43        | 358.1              | 340.1                 | 314.1                 | 77        | 30             | 24             | 0.5,5,25                           | 79.43, 90.53, 80.86   | 5.78, 4.62, 5.32    | 0.1            | 0.5            | 30 (China)     |
| 161 | difloxacin            | 10.64       | 400.1              | 356.1                 | 299.1                 | 80        | 28             | 41             | 0.5,5,25                           | 101.91, 96.34, 87.38  | 6.86, 4.18, 6.57    | 0.1            | 0.5            |                |
| 162 | orbifloxacin          | 10.40       | 396                | 352                   | 295.2                 | 80        | 24             | 32             | 0.5,5,25                           | 102.25, 96.48, 86.27  | 3.55, 5.55, 3.30    | 0.1            | 0.5            |                |
| 163 | sparfloxacin          | 12.63       | 393                | 349.2                 | 292                   | 80        | 30             | 38             | 0.5,5,25                           | 96.37, 99.61, 92.34   | 8.23, 2.22, 2.31    | 0.1            | 0.5            |                |
| 164 | floxacin              | 7.54        | 370                | 326.1                 | 269.2                 | 80        | 27             | 35             | 0.5,5,25                           | 87.57, 93.25, 88.75   | 3.86, 6.12, 7.89    | 0.1            | 0.5            |                |
| 165 | erythromycin          | 15.86       | 734.5              | 576.4                 | 158                   | 30        | 26             | 36             | 0.5,5,25                           | 60.64, 69.03, 60.66   | 12.76, 11.69, 6.58  | 0.1            | 0.5            | 40 (China)     |
| 166 | clindamycin           | 14.67       | 425.3              | 126.1                 | 377.1                 | 50        | 32             | 27             | 0.5,5,25                           | 67.82, 67.18, 62.14   | 4.20, 3.24, 4.39    | 0.1            | 0.5            |                |
| 167 | roxithromycin         | 16.73       | 837.6              | 679.5                 | 158.1                 | 50        | 30             | 37             | 0.5,5,25                           | 104.53, 94.87, 86.41  | 17.03, 11.79, 10.44 | 0.1            | 0.5            |                |
| 168 | josamycin             | 16.50       | 828.6              | 174.1                 | 109                   | 70        | 38             | 70             | 0.5,5,25                           | 89.90, 89.21, 82.14   | 13.27, 8.38, 3.37   | 0.1            | 0.5            |                |
| 169 | tylosin               | 15.68       | 916.6              | 174                   | 772.5                 | 150       | 47             | 43             | 1,5,25                             | 118.03, 96.24, 91.30  | 9.26, 3.74, 4.39    | 0.5            | 1              | 50 (China)     |
| 170 | kitasamycin           | 15.86       | 772.5              | 109                   | 215.1                 | 140       | 84             | 39             | 1,5,25                             | 93.57, 99.66, 87.18   | 19.17, 11.55, 3.87  | 0.5            | 1              |                |
| 171 | tilmicosin            | 14.57       | 869.5              | 696.5                 | 174.2                 | 100       | 52             | 52             | 1,5,25                             | 86.22, 134.42, 117.93 | 5.98, 9.48, 3.96    | 0.5            | 1              | 50 (China)     |
| 172 | cefixime              | 8.20        | 454                | 285                   | 126                   | 55        | 23             | 33             | 5,10,25                            | 59.82, 51.20, 54.66   | 12.7, 12.64, 9.46   | 1              | 5              |                |
| 173 | cefetamet pivoxyl     | 15.87       | 511.95             | 240.9                 | 125.9                 | 50        | 25             | 59             | 1,5,25                             | 115.73, 107.86, 95.86 | 8.40, 5.63, 4.86    | 0.5            | 1              |                |
| 174 | cefazolin             | 8.50        | 454.877            | 323                   | 155.8                 | 60        | 15             | 21             | 1,5,25                             | 64.05, 95.64, 85.76   | 12.21, 6.80, 5.41   | 0.5            | 1              |                |
| 175 | cefamandole lithium   | 12.00       | 463                | 347                   | 158.1                 | 70        | 12             | 23             | 1,5,25                             | 75.91, 96.41, 94.26   | 10.9, 6.66, 5.39    | 0.5            | 1              |                |
| 176 | cefoperazone sodium   | 10.20       | 646.4              | 143                   | 530.2                 | 70        | 38             | 15             | 1,5,25                             | 118.04, 79.70, 79.26  | 11.86, 18.38, 10.03 | 0.5            | 1              |                |
| 177 | cefotaxime            | 8.00        | 456                | 166.9                 | 125                   | 60        | 28             | 70             | 1,5,25                             | 103.20, 89.22, 75.23  | 13.86, 7.58, 1.88   | 0.5            | 1              |                |
| 178 | tetracycline          | 9.20        | 445.1              | 410.2                 | 427.1                 | 80        | 24             | 19             | 5,10,25                            | 79.05, 82.62, 86.09   | 17.58, 17.81, 3.67  | 1              | 5              | 100 (China)    |
| 179 | epi-tetracycline      | 9.20        | 445                | 410.2                 | 427.1                 | 80        | 24             | 19             | 5,10,25                            | 69.21, 68.78, 65.56   | 9.93, 13.04, 16.98  | 1              | 5              |                |
| 180 | oxytetracycline       | 9.60        | 461.2              | 426.2                 | 443.2                 | 80        | 25             | 17             | 5,10,25                            | 66.8, 61.52, 60.38    | 18.15, 6.80, 10.42  | 1              | 5              | 100 (China)    |
| 181 | chlortetracycline     | 13.04       | 479.1              | 462                   | 444                   | 80        | 24             | 28             | 5,10,25                            | 83.87, 72.04, 72.11   | 17.54, 18.68, 12.29 | 1              | 5              | 100 (China)    |
| 182 | epi-chlortetracycline | 12.99       | 479                | 462                   | 444                   | 80        | 24             | 28             | 5,10,25                            | 65.33, 58.49, 55.95   | 10.72, 12.64, 19.08 | 1              | 5              |                |



| No. | compound             | RT<br>(min) | precursor<br>(m/z) | product<br>1<br>(m/z) | product<br>2<br>(m/z) | DP<br>(V) | CE<br>1<br>(V) | CE<br>2<br>(V) | spiked<br>concentration<br>(μg/kg) | recovery<br>(μg/kg)    | RSD<br>(%)          | LOD<br>(μg/kg) | LOQ<br>(μg/kg) | MRL<br>(μg/kg) |
|-----|----------------------|-------------|--------------------|-----------------------|-----------------------|-----------|----------------|----------------|------------------------------------|------------------------|---------------------|----------------|----------------|----------------|
| 183 | doxycycline          | 14.18       | 445                | 428.1                 | 154.1                 | 80        | 24             | 35             | 5,10,25                            | 82.68, 101.19, 76.64   | 17.70, 17.07, 12.68 | 1              | 5              |                |
| 184 | clopidol             | 7.52        | 192.2              | 100.9                 | 86.9                  | 80        | 35             | 42             | 1,5,25                             | 75.74, 65.53, 77.01    | 10.91, 14.70, 3.65  | 0.5            | 1              | 20(China)      |
| 185 | amantadine           | 10.10       | 152.1              | 135                   | 93                    | 70        | 25             | 38             | 1,5,25                             | 95.65, 85.56, 69.47    | 7.95, 3.10, 4.75    | 0.5            | 1              |                |
| 186 | promethazine         | 15.39       | 285                | 86.2                  | 198.1                 | 80        | 19             | 27             | 1,5,25                             | 115.55, 103.57, 92.97  | 12.87, 4.03, 4.79   | 0.5            | 1              |                |
| 187 | rimantadine          | 14.62       | 180.1              | 163                   | 81                    | 80        | 21             | 30             | 1,5,25                             | 118.72, 100.26, 87.75  | 15.91, 5.91, 5.49   | 0.5            | 1              |                |
| 188 | fenoterol            | 6.10        | 304.1              | 135.1                 | 107.2                 | 100       | 23             | 36             | 1,5,25                             | 96.92, 89.14, 80.57    | 10.13, 9.23, 11.31  | 0.5            | 1              |                |
| 189 | phenylethanolamine A | 14.43       | 345.1              | 327.3                 | 150.1                 | 90        | 18             | 30             | 1,5,25                             | 123.66, 115.33, 96.44  | 12.93, 2.96, 4.80   | 0.5            | 1              |                |
| 190 | bambuterol           | 13.27       | 368.2              | 294.3                 | 72.2                  | 100       | 26             | 37             | 1,5,25                             | 122.60, 102.54, 90.55  | 8.19, 4.13, 2.83    | 0.5            | 1              |                |
| 191 | mabuterol            | 12.75       | 311.1              | 237.2                 | 202.1                 | 110       | 24             | 40             | 0.5,5,25                           | 114.90, 96.05, 91.06   | 6.93, 3.60, 3.90    | 0.1            | 0.5            |                |
| 192 | cimbuterol           | 5.74        | 234                | 160.1                 | 143                   | 70        | 21             | 34             | 0.5,5,25                           | 124.52, 124.29, 120.35 | 15.4, 13.69, 4.63   | 0.1            | 0.5            |                |
| 193 | brombuterol          | 12.50       | 367                | 293                   | 349.2                 | 90        | 24             | 17             | 0.5,5,25                           | 113.76, 97.45, 92.87   | 3.23, 4.82, 4.04    | 0.1            | 0.5            |                |
| 194 | sulfisomidine        | 5.56        | 279.1              | 124                   | 186.1                 | 60        | 30             | 23             | 0.5,5,25                           | 61.72, 90.62, 80.75    | 8.14, 4.95, 5.70    | 0.1            | 0.5            |                |
| 195 | sulfaguanidine       | 4.91        | 215                | 156                   | 108                   | 50        | 17             | 35             | 0.5,5,25                           | 103.84, 91.23, 76.31   | 2.84, 6.66, 6.72    | 0.1            | 0.5            |                |
| 196 | marbofloxacin        | 7.27        | 363.4              | 320.3                 | 72                    | 45        | 23             | 46             | 0.5,5,25                           | 81.57, 76.57, 71.96    | 14.43, 8.87, 7.49   | 0.1            | 0.5            |                |
| 197 | penicillin G         | 15.01       | 335.2              | 176                   | 160                   | 68        | 16             | 19             | 0.5,5,25                           | 88.27, 80.38, 79.49    | 10.15, 10.18, 7.75  | 0.1            | 0.5            | 4 (China)      |
| 198 | penicillin V         | 15.63       | 351.2              | 160                   | 114                   | 74        | 14             | 46             | 0.5,5,25                           | 68.04, 87.85, 88.42    | 14.91, 19.86, 5.04  | 0.1            | 0.5            |                |
| 199 | ampicillin           | 8.73        | 350                | 106                   | 160                   | 65        | 30             | 19             | 0.5,5,25                           | 65.48, 64.67, 63.97    | 18.57, 11.08, 18.15 | 0.1            | 0.5            | 10 (China)     |
| 200 | oxacillin            | 15.67       | 402.2              | 160                   | 243                   | 80        | 19             | 19             | 0.5,5,25                           | 102.70, 102.65, 97.45  | 6.83, 12.87, 7.31   | 0.1            | 0.5            | 30 (China)     |
| 201 | cloxacillin          | 15.89       | 436.1              | 160                   | 277                   | 76        | 18             | 19             | 0.5,5,25                           | 116.45, 106.11, 101.50 | 17.41, 12.35, 10.28 | 0.1            | 0.5            | 30 (China)     |
| 202 | clarithromycin       | 16.62       | 748.5              | 590.4                 | 158                   | 40        | 29             | 40             | 0.5,5,25                           | 103.91, 75.23, 79.65   | 11.86, 8.02, 7.66   | 0.1            | 0.5            |                |
| 203 | oleandomycin         | 15.08       | 688.4              | 158.2                 | 544.3                 | 30        | 70             | 42             | 5,10,25                            | 116.11, 102.75, 105.51 | 9.32, 5.40, 6.65    | 1              | 5              |                |
| 204 | tiamulin             | 15.53       | 494.3              | 192                   | 119.1                 | 80        | 26             | 54             | 0.5,5,25                           | 108.69, 109.47, 99.70  | 11.67, 6.01, 7.02   | 0.1            | 0.5            |                |
| 205 | valnemulin           | 16.73       | 565.4              | 263.4                 | 147                   | 80        | 22             | 52             | 1,5,25                             | 102.15, 94.99, 78.74   | 17.68, 14.00, 12.27 | 0.5            | 1              |                |

| No. | compound     | RT<br>(min) | precursor<br>(m/z) | product<br>1<br>(m/z) | product<br>2<br>(m/z) | DP<br>(V) | CE<br>1<br>(V) | CE<br>2<br>(V) | spiked<br>concentration<br>(µg/kg) | recovery<br>(µg/kg)  | RSD<br>(%)         | LOD<br>(µg/kg) | LOQ<br>(µg/kg) | MRL<br>(µg/kg) |
|-----|--------------|-------------|--------------------|-----------------------|-----------------------|-----------|----------------|----------------|------------------------------------|----------------------|--------------------|----------------|----------------|----------------|
| 206 | abamectin    | 20.03       | 895.5              | 751.4                 | 449.1                 | 50        | 60             | 60             | 1,5,25                             | 120.87, 87.65, 75.12 | 5.59, 3.16, 6.29   | 0.5            | 1              | 5 (EU)         |
| 207 | ivermectin   | 20.03       | 897.5              | 753.2                 | 329.2                 | 50        | 55             | 70             | 5,10,25                            | 85.96, 78.36, 70.82  | 9.09, 8.12, 5.92   | 1              | 5              |                |
| 208 | doramectin   | 20.41       | 921.5              | 353.2                 | 449.1                 | 50        | 70             | 60             | 5,10,25                            | 82.41, 69.48, 65.97  | 10.57, 12.82, 8.79 | 1              | 5              |                |
| 209 | eprinomectin | 19.83       | 936.5              | 490.1                 | 352.1                 | 55        | 70             | 75             | 1,5,25                             | 109.54, 95.30, 85.57 | 13.1, 13.62, 10.43 | 0.5            | 1              |                |

<sup>a</sup> Sum of carbendazim and benomyl.

<sup>b</sup> Sum of triadimefon and triadimenol.

<sup>c</sup> Sum of aldicarb, aldicarb sulfone and aldicarb sulfoxide.
